# Supplementary material for: Effect of surface polishing on roughness, biofilm formation, and biocompatibility of 3D-printed denture base resins
Source: Research Square preprint supplement (doi:10.21203/rs.3.rs-8491667/v1), 2026-01-19

**Supplementary material**

**Table 1.** Composition/information on ingredients released by the company.

| **Name** | **Product identifier** | **% w/w** |
| --- | --- | --- |
| Ethoxylated bisphenol A dimethacrylate | (CAS-No.) 41637-38-1 (EC-No.) 609-946-4 | ≥75 |
| 7,7,9(or 7,9,9)-trimethyl-4,13-dioxo-3,14-dioxa-5,12-diazahexadecane-1,16-diyl bismethacrylate | (CAS-No.) 72869-86-4 (EC-No.) 276-957-5 (REACH-no) 01-2120751202-68 | 10 - 20 |
| 2-hydroxyethyl methacrylate | (CAS-No.) 868-77-9 (EC-No.) 212-782-2 (EC Index-No.) 607-124-00-X (REACH-no) 01-2119490169-29 | 5 - 10 |
| Silicon dioxide | (CAS-No.) 7631-86-9 (EC-No.) 231-545-4 (REACH-no) 01-2119379499-16 | 5 - 10 |
| diphenyl(2,4,6- trimethylbenzoyl)phosphine oxide | (CAS-No.) 75980-60-8 (EC-No.) 278-355-8 (EC Index-No.) 015-203-00-X (REACH-no) 01-2119972295-29 | 1 - 5 |
| Titanium dioxide | (CAS-No.) 13463-67-7 (EC-No.) 236-675-5 (REACH-no) 01-2119489379-17 | < 0,1 |

**Figure 1.** Representative stress-strain curves of P and NP samples.


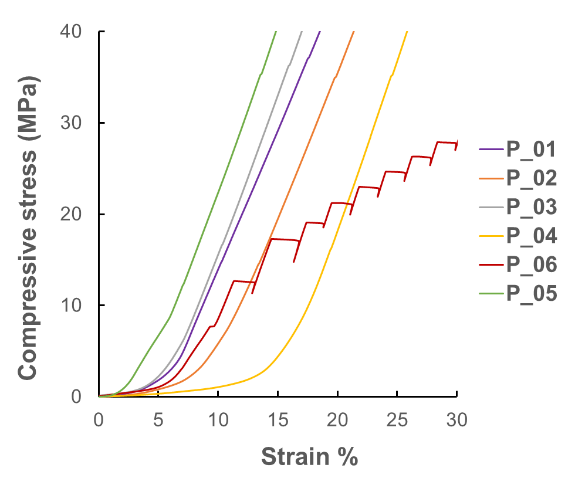

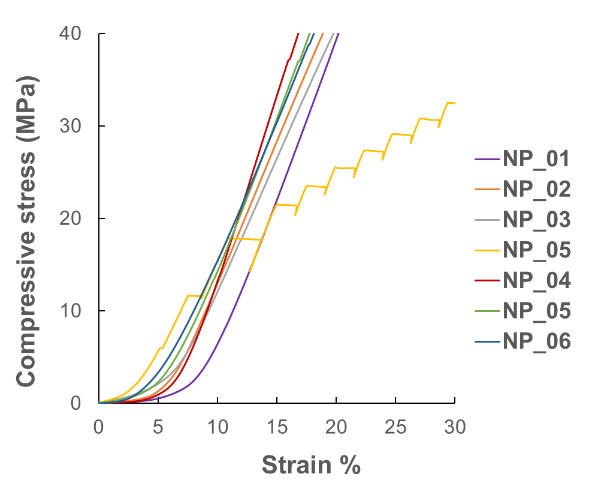

Supplement: Supplementary file 1 [file 79b0c48a0c95787e6edfac9e.docx]
